# Supplementary material for: Inhibition of the sodium-dependent HCO3- transporter SLC4A4, produces a cystic fibrosis-like airway disease phenotype
Source: eLife journal article supplement (doi:10.7554/elife.75871), 2022-05-30
Supplement: supp [file elife-75871-supp-v1.zip]

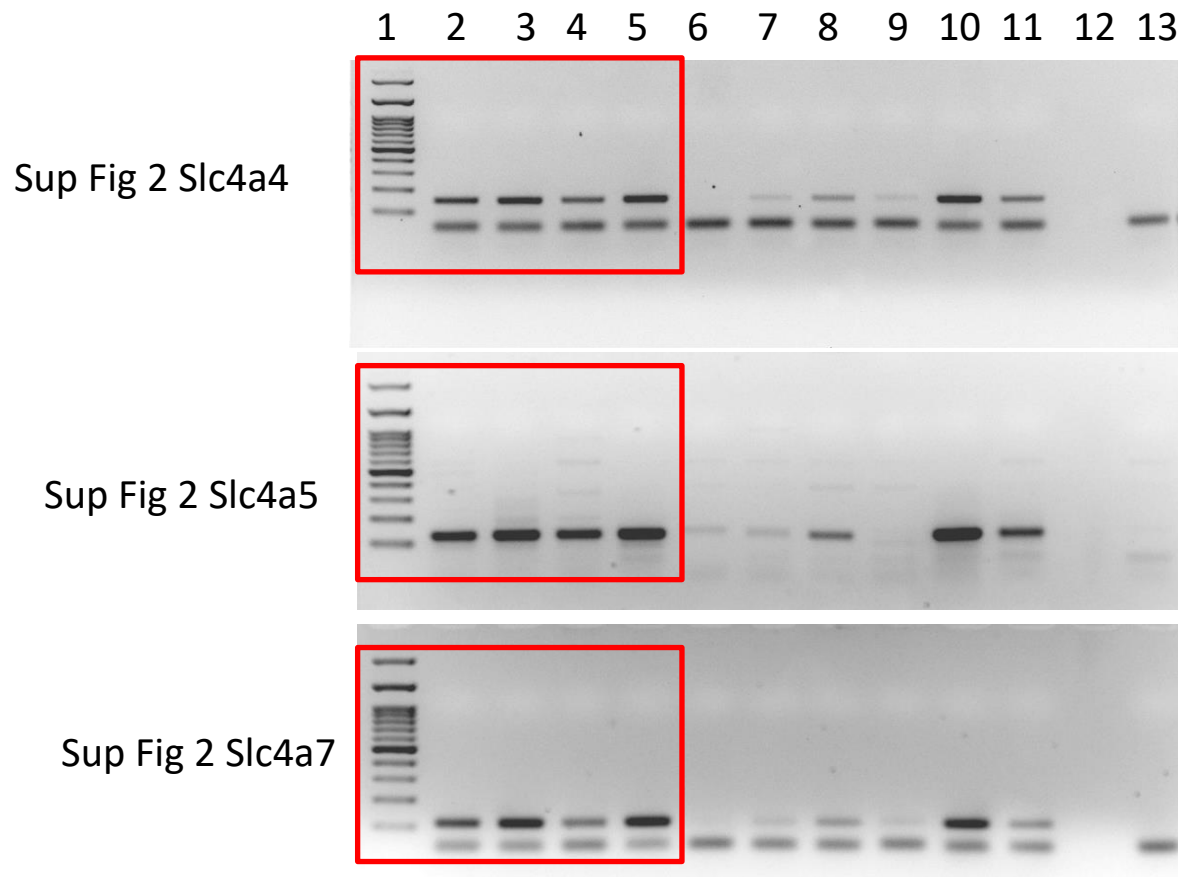

Lane 1 Ladder 100 bp

Lane 2 Airway cells mouse 1

Lane 3 Airway cells mouse 2

Lane 4 Airway cells mouse 3

Lane 5 Airway cells mouse 4

Lane 6 Airway cells mouse 1 (1:100)

Lane 7 Airway cells mouse 1 (1:50)

Lane 8 Airway cells mouse 2 (1:100)

Lane 9 Airway cells mouse 2 (1:50)

Lane 10 Whole lung mouse 1

Lane 11 Whole lung mouse 2

Lane 12 None

Lane 13 RT-PCR negative control.

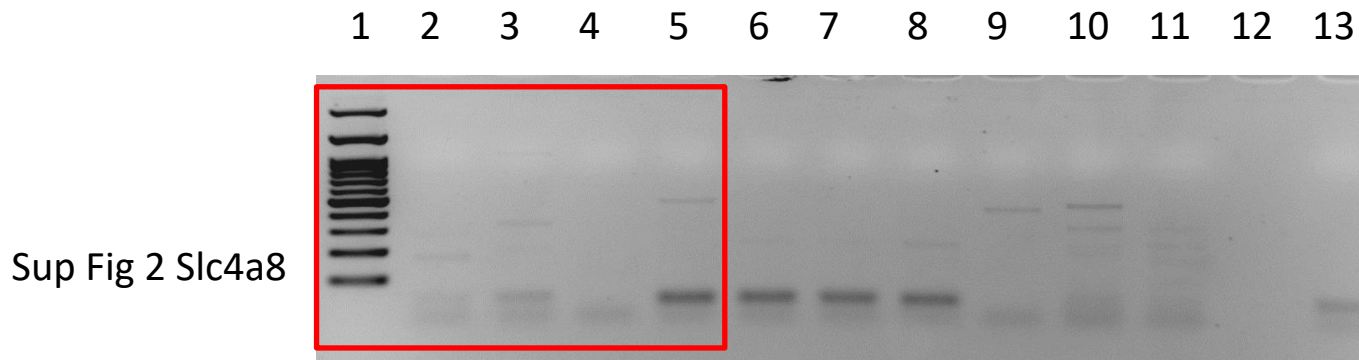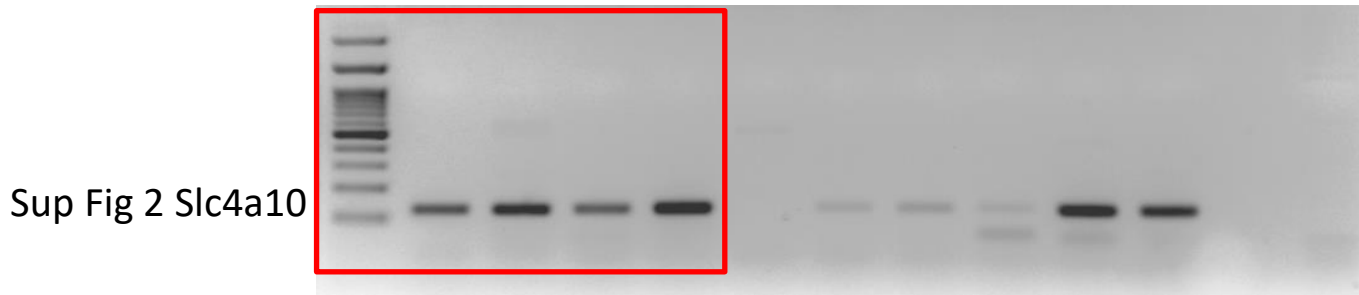

Lane 1 Ladder 100 bp

Lane 2 Airway cells mouse 1

Lane 3 Airway cells mouse 2

Lane 4 Airway cells mouse 3

Lane 5 Airway cells mouse 4

Lane 6 Airway cells mouse 1 (1:100)

Lane 7 Airway cells mouse 1 (1:50)

Lane 8 Airway cells mouse 2 (1:100)

Lane 9 Airway cells mouse 2 (1:50)

Lane 10 Whole lung mouse 1

Lane 11 Whole lung mouse 2

Lane 12 None

Lane 13 RT-PCR negative control.

Sup Fig 2 Slc4a4-A

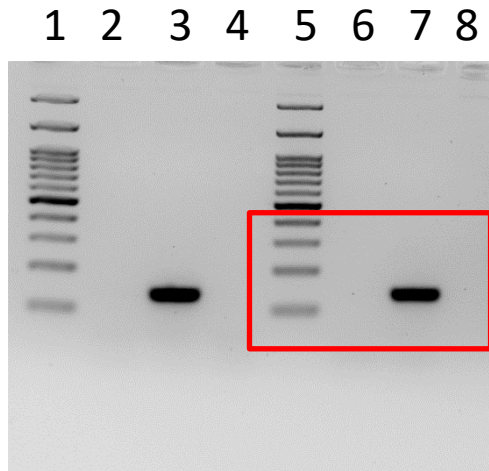

Lanes 1 Ladder 100bp

Lane 2 airway epithelial cells mouse 3

Lane 3 kidney mouse 3

Lane 4 RT-PCR negative control

Lane 5 Ladder 100bp

Lane 6 airway epithelial cells mouse 4

Lane 7 kidney mouse 4

Lanes 8 RT-PCR negative control

Sup Fig 2 Slc4a4-B

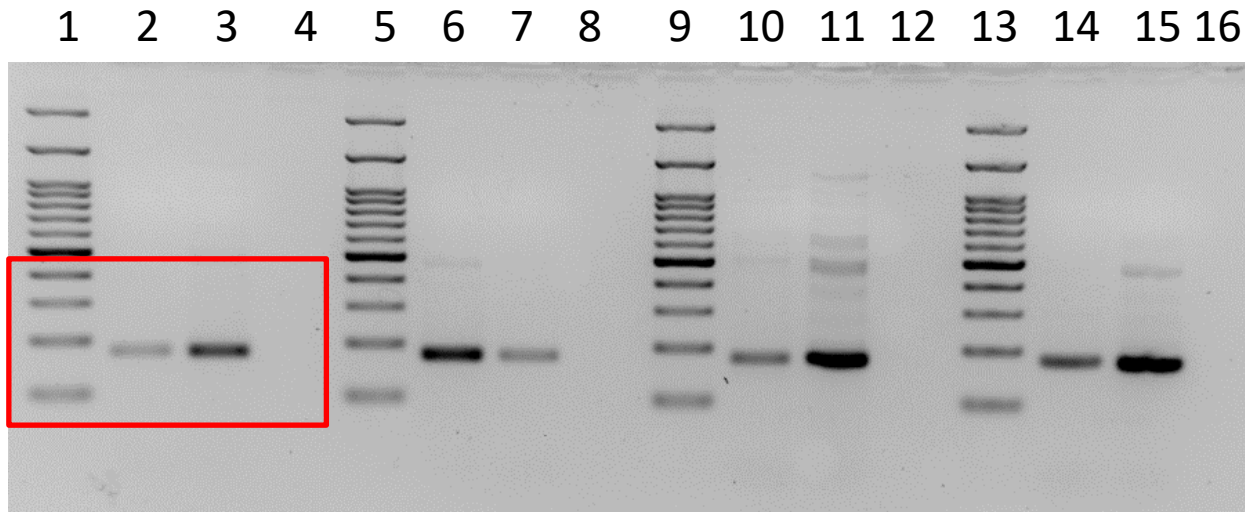

Lanes 1,5,9 &13 Ladder 100 bp

Lane 2 airway epithelial cells mouse 1

Lane 3 kidney mouse 1

Lane 4 RT-PCR negative control

Lane 6 airway epithelial cells mouse 2

Lane 7 kidney mouse 2

Lane 8 RT-PCR negative control

Lane 10 airway epithelial cells mouse 3

Lane 11 kidney mouse 3

Lane 12 RT-PCR negative control

Lane 14 airway epithelial cells mouse 4

Lane 15 kidney mouse 4

Lane 16 RT-PCR negative control
