# Supplementary material for: Inhibition of the sodium-dependent HCO3- transporter SLC4A4, produces a cystic fibrosis-like airway disease phenotype
Source: eLife journal article supplement (doi:10.7554/elife.75871), 2022-05-30
Supplement: supp [file elife-75871-supp-v1.zip]

Sup Fig 1 SLC4A4 NBCE1B

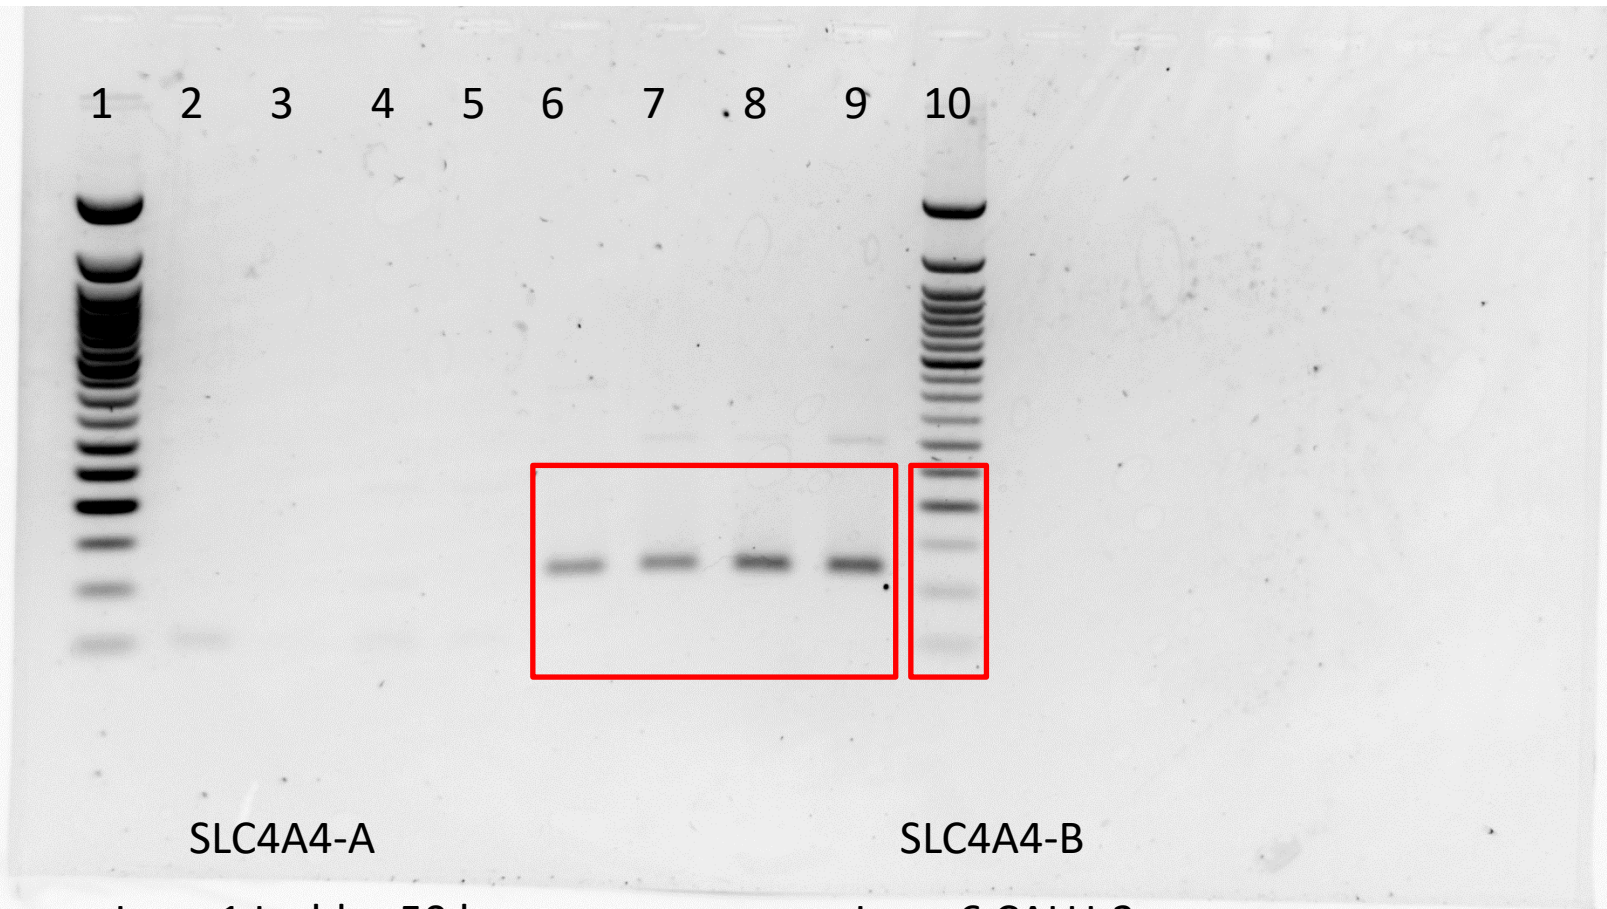

SLC4A4-A

Lane 1 Ladder 50 bp  
Lane 2 kidney  
Lane 3 patient 1  
Lane 4 patient 2  
Lane 5 patient 3

SLC4A4-B

Lane 6 CALU-3  
Lane 7 patient 1  
Lane 8 patient 2  
Lane 9 patient 3  
Lane 10 Ladder 50 bp

Sup Fig 1 SLC4A5 and 7

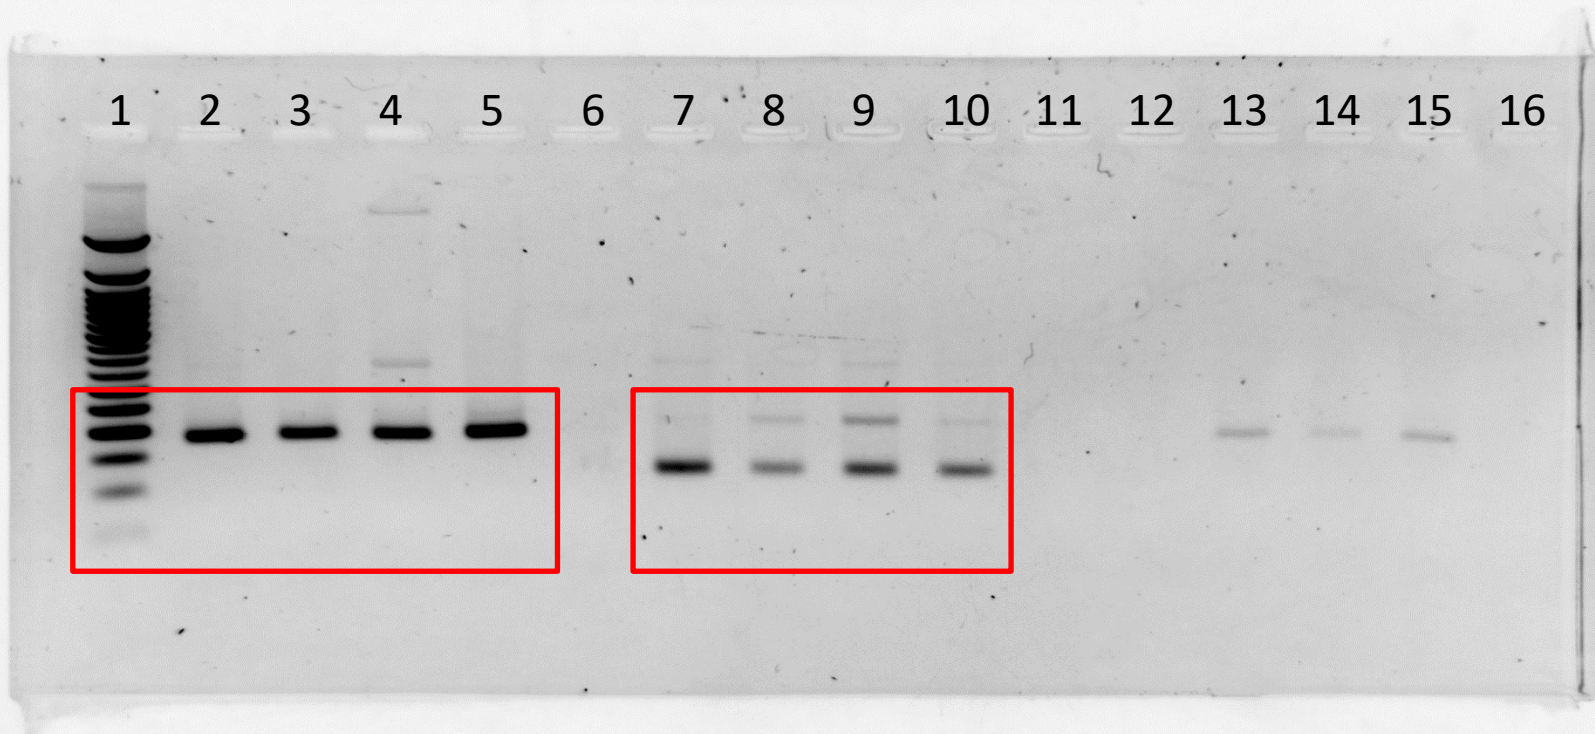

SLC4A5

Lane 1 Ladder 50 bp  
Lane 2 CALU-3  
Lane 3 patient 1  
Lane 4 patient 2  
Lane 5 patient 3  
Lane 6 none

SLC4A7

Lane 7 CALU-3  
Lane 8 patient 1  
Lane 9 patient 2  
Lane 10 patient 3  
Lane 11 none

SLC4A8

Lane 12 CALU-3  
Lane 13 patient 1  
Lane 14 patient 2  
Lane 15 patient 3  
Lane 16 none



Sup Fig 1 SLC4A8

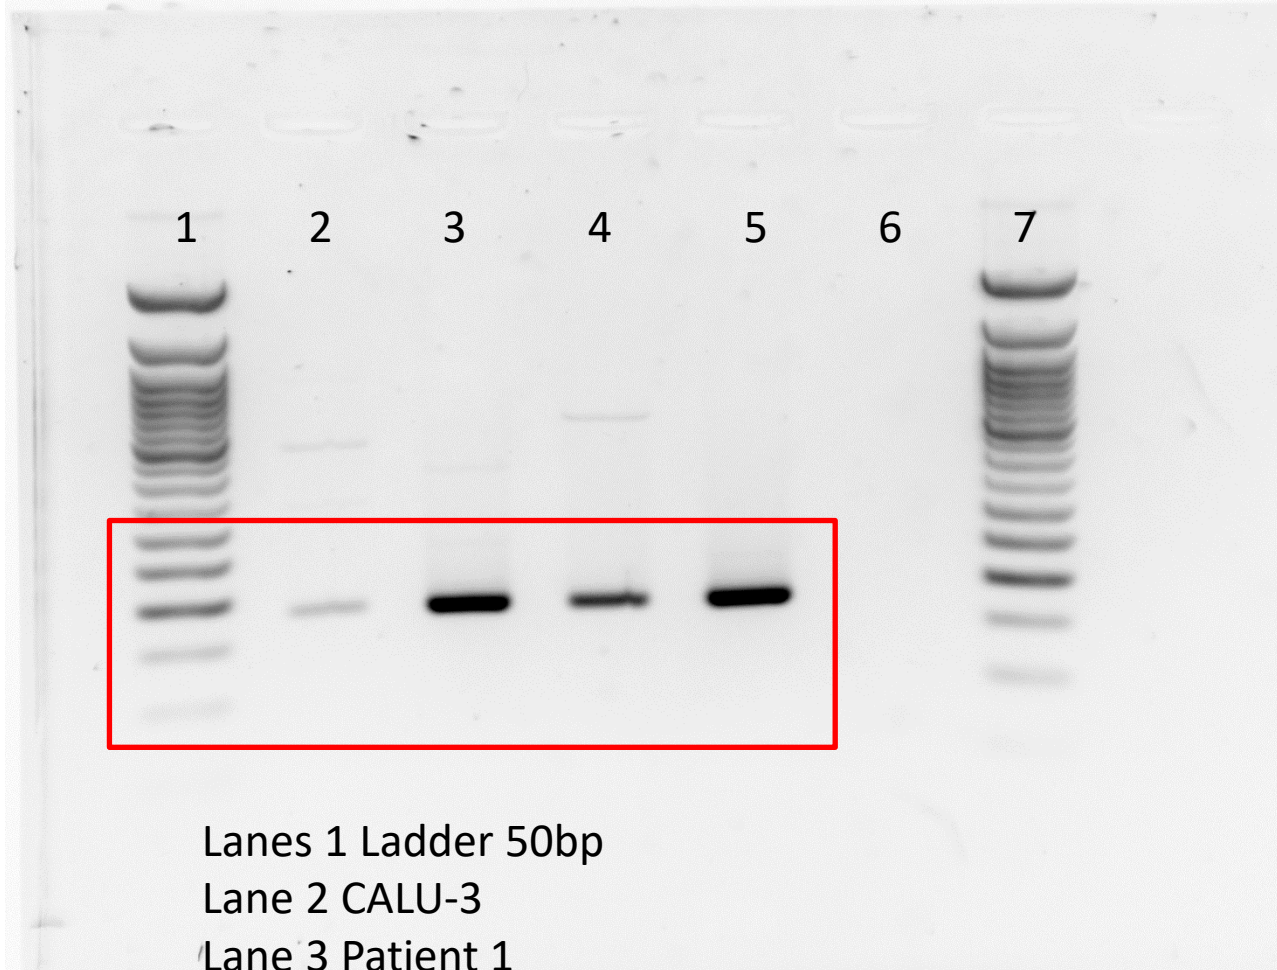

Lanes 1 Ladder 50bp

Lane 2 CALU-3

Lane 3 Patient 1

Lane 4 Patient 2

Lane 5 Patient 3

Lane 6 none

Lane 7 Ladder 50bp

Sup Fig 1 SLC4A4 NBCe1A

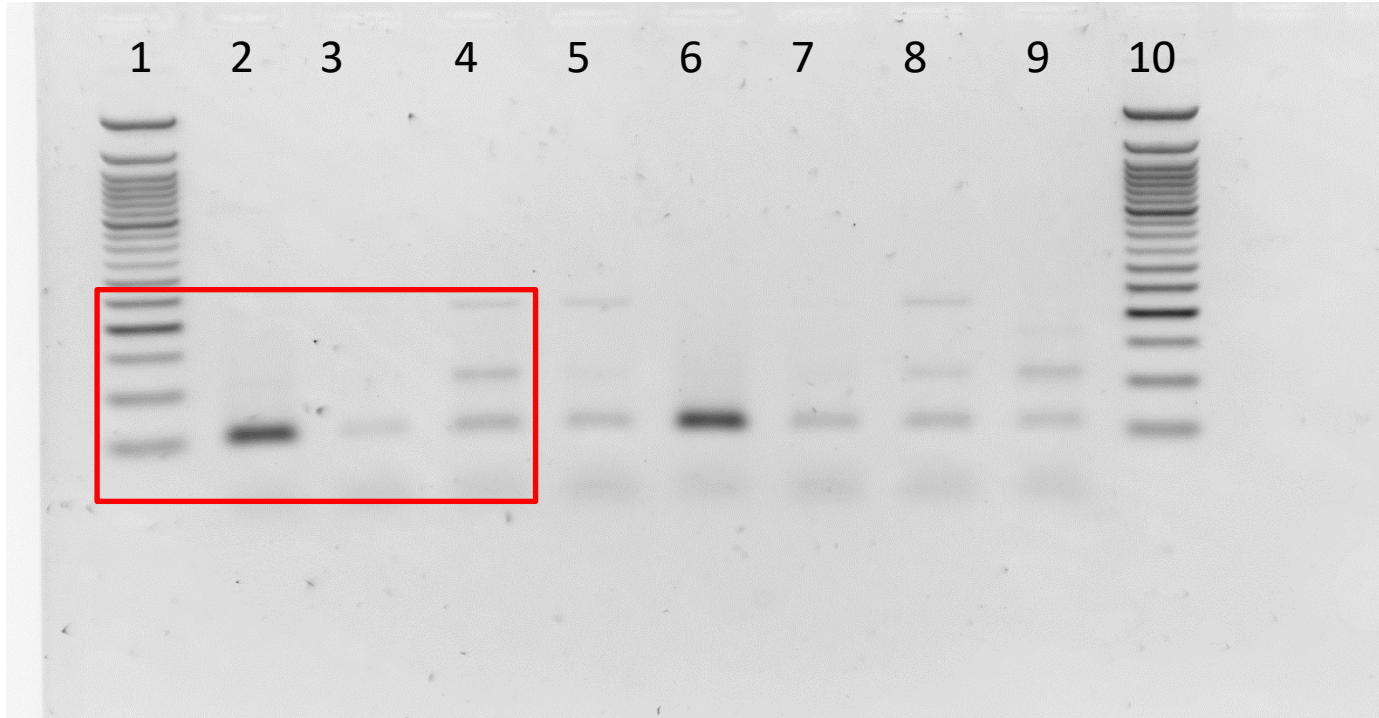

Lane 1 Ladder 50 bp

Lane 2 kidney

Lane 3 patient 1

Lane 4 patient 2

Lane 5 patient 3

Lane 6 kidney

Lane 7 patient 4

Lane 8 patient 5

Lane 9 patient 6

Lane 10 Ladder 50 bp

Sup Fig 1 SLC4A10

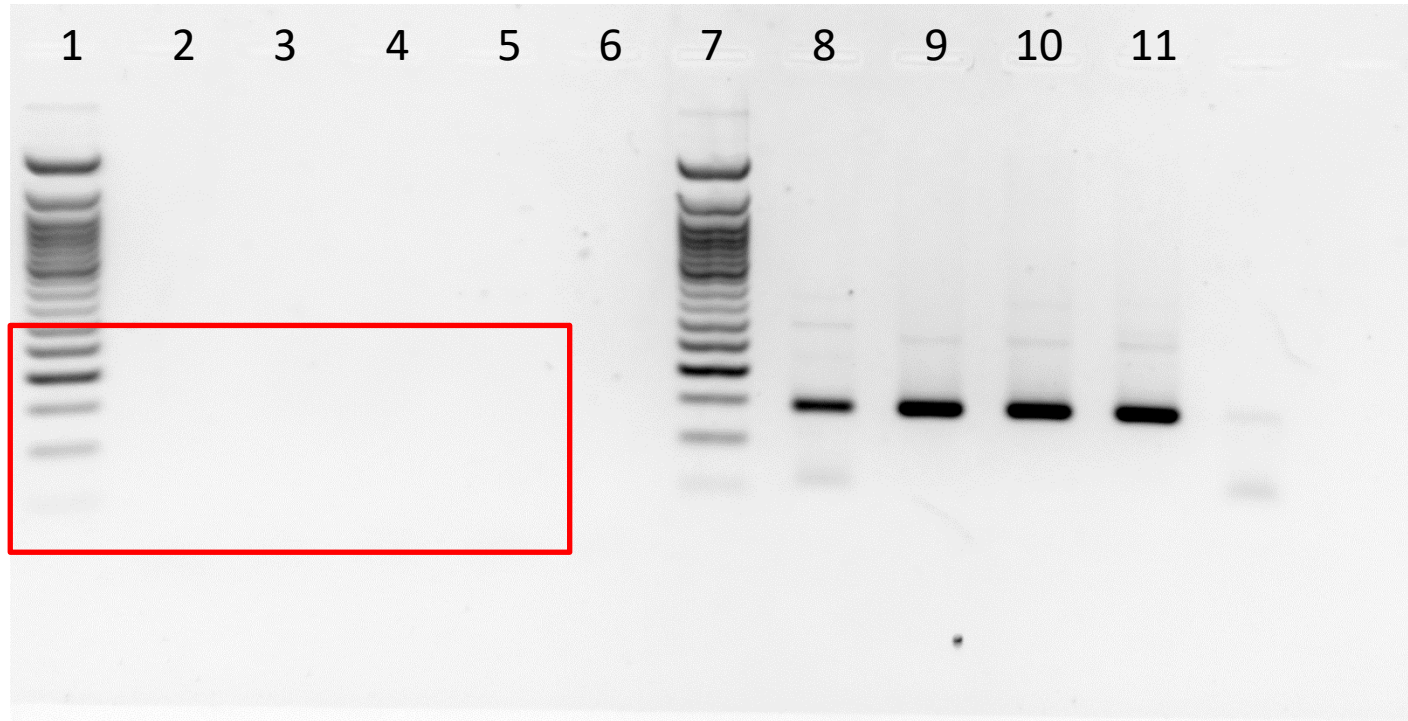

SLC4A10

Lane 1 Ladder 50 bp  
Lane 2 kidney  
Lane 3 patient 1  
Lane 4 patient 2  
Lane 5 patient 3  
Lane 6 none

SLC4A11

Lane 7 Ladder 50 bp  
Lane 8 kidney  
Lane 9 patient 1  
Lane 10 patient 2  
Lane 11 patient 3
